# Supplementary material
Source: MDPI journal article supplement (https://www.mdpi.com/2071-1050/14/16/9898)
Supplement: s1 [file s1]

# Supplementary Material

## Groundwater contamination risk assessment based on groundwater vulnerability and pollution loading: A case study of typical Karst areas in China

Yanna Xiong 1, Jingchao Liu 2, Wenchao Yuan 1, Weijiang Liu 1,\*, Shaobing Ma 1, Zhiyu Wang 3, Tongtong Li 1, Yanwei Wang 1, and Jin Wu 4,\*

1 Technical Centre for Soil, Agriculture and Rural Ecology and Environment, Ministry of Ecology and Environment, Beijing 100012 China; xiongyanna@tcare-mee.cn

2 Beijing Normal University, Beijing 100091 China; liujingchao721@126.com

3 China University of Mining & Technology, Beijing, Beijing 100083 China; wzyzw123@163.com

4 Faculty of Architecture, Civil and Transportation Engineering, Beijing University of Technology, Beijing 100124 China; WuJin@bjut.edu.cn

\* Correspondence: liuweijiang@tcare-mee.cn (W.J.), Tel.: +86-135-2005-0376 (W.J.); WuJin@bjut.edu.cn (J.), Tel.: +86-151-1793-1639 (J.)

### Table List

**Table S1.** Abbreviation full name comparison.

**Table S2.** Sources of Research Data.

**Table S1.** Abbreviation full name comparison.

| full name                                                            | abbreviation |
|----------------------------------------------------------------------|--------------|
| Total dissolved solids                                               | TDS          |
| Anionic surfactant                                                   | LAS          |
| Chemical oxygen demand                                               | COD          |
| Protective cover                                                     | P            |
| Land use                                                             | L            |
| Epikarst development                                                 | E            |
| Infiltration conditions                                              | I            |
| Karst development                                                    | K            |
| Cation exchange capacity                                             | CEC          |
| Groundwater vulnerability                                            | GV           |
| Pollution loading index                                              | PI           |
| Canadian Council of Ministers of the Environment Water Quality Index | CCME WQI     |
| Groundwater contamination risk index                                 | GRI          |

**Table S2.** Sources of Research Data.

| Data type             | Data sources                                |
|-----------------------|---------------------------------------------|
| Pollution source data | Second survey of pollution sources          |
| Pikarst development   | 1:200,000 comprehensive hydrogeological map |
| Karst development     | 1:200,000 comprehensive hydrogeological map |
| CEC data              | Harmonized World Soil Database              |
| Land use              | Cloud platform for geographic monitoring    |
